# Supplementary material for: China's low fertility may not hinder future prosperity
Source: PubMed Central journal article supplement (PMC8501780; doi:10.1073/pnas.2108900118), 2021-09-27
Supplement: pnas.2108900118.sapp.pdf [file pnas.2108900118.sapp.pdf]

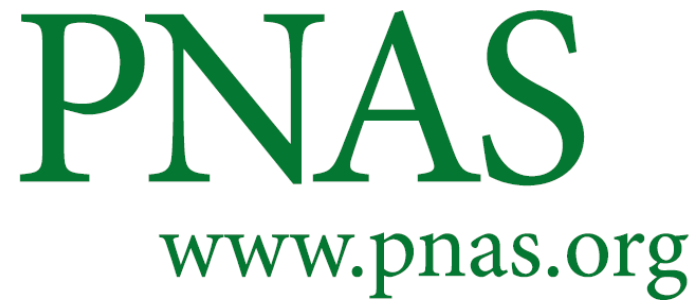

Supplementary Information for

**China's low fertility may not hinder future prosperity.**

**Authors :** Guillaume Marois<sup>1,3</sup>, Stuart Gietel-Basten<sup>2\*</sup>, Wolfgang Lutz<sup>3</sup>

1. Asian Demographic Research Institute, Shanghai University, Baoshan, Shanghai, China.
  2. Division of Social Science, The Hong Kong University of Science and Technology, Clear Water Bay, Kowloon, Hong Kong SAR, China.
  3. Wittgenstein Centre for Demography and Global Human Capital (University of Vienna, IIASA, VID/ÖAW), International Institute for Applied Systems Analysis, 2361 Laxenburg, Austria. \* Corresponding author
- \*Correspondence to:** [sgb@ust.hk](mailto:sgb@ust.hk)

**This PDF file includes:**

- SI Table 1-4
- SI Figure 1-3

**SI Table 1. Summary of assumptions**

|                                           |                    | <b>2015</b> | <b>2040</b> | <b>2070</b> |
|-------------------------------------------|--------------------|-------------|-------------|-------------|
| <b>Life expectancy</b>                    |                    |             |             |             |
| Women                                     | No education       | 76.1        | 79.9        | 85.0        |
|                                           | Primary incomplete | 76.8        | 80.6        | 85.7        |
|                                           | Primary            | 77.5        | 81.3        | 86.4        |
|                                           | Lower secondary    | 79.0        | 82.7        | 87.7        |
|                                           | Upper secondary    | 79.9        | 83.6        | 88.5        |
|                                           | Postsecondary      | 80.7        | 84.4        | 89.3        |
| Men                                       | No education       | 71.3        | 74.8        | 79.6        |
|                                           | Primary incomplete | 72.4        | 75.9        | 80.6        |
|                                           | Primary            | 73.4        | 76.9        | 81.6        |
|                                           | Lower secondary    | 75.6        | 79.0        | 83.7        |
|                                           | Upper secondary    | 76.8        | 80.3        | 84.9        |
|                                           | Postsecondary      | 78.0        | 81.4        | 86.0        |
| <b>Immigration (5-year)</b>               |                    | 97,101      | 121,965     | 145,975     |
| <b>Emigration (5-year)</b>                |                    | ~0.7%       | ~0.7%       | ~0.7%       |
| <b>Mean age at birth</b>                  |                    | 27.9        | 30.9        | 31.7        |
| <b>Educational attainment (age 20-39)</b> |                    |             |             |             |
| Women                                     | No education       | 0.8%        | 0.0%        | 0.0%        |
|                                           | Primary incomplete | 3.0%        | 0.2%        | 0.0%        |
|                                           | Primary            | 6.3%        | 0.2%        | 0.0%        |
|                                           | Lower secondary    | 47.4%       | 18.8%       | 1.3%        |
|                                           | Upper secondary    | 21.2%       | 40.0%       | 29.3%       |
|                                           | Postsecondary      | 21.4%       | 40.8%       | 69.3%       |
| Men                                       | No education       | 0.5%        | 0.0%        | 0.0%        |
|                                           | Primary incomplete | 1.9%        | 0.3%        | 0.0%        |
|                                           | Primary            | 4.9%        | 0.2%        | 0.0%        |
|                                           | Lower secondary    | 48.3%       | 23.1%       | 3.0%        |
|                                           | Upper secondary    | 23.0%       | 41.4%       | 37.2%       |
|                                           | Postsecondary      | 21.3%       | 35.0%       | 59.8%       |

SI Table 2. Regression parameters on the labor force participation

|                               |                 | Males     |          |     | Females   |          |     |
|-------------------------------|-----------------|-----------|----------|-----|-----------|----------|-----|
|                               |                 | Parameter | SE       |     | Parameter | SE       |     |
| <b>Intercept</b>              |                 | 0.823     | 0.614    |     | -1.774    | 0.614    |     |
| <b>EDU</b><br>(ref='Primary') | No education    | -5.452    | 1.197    | *** | -1.439    | 1.197    | *** |
|                               | Lower secondary | -1.022    | 0.705    |     | -2.126    | 0.705    |     |
|                               | Upper secondary | -8.096    | 0.676    | *** | -3.109    | 0.676    | *** |
|                               | Postsecondary   | -12.274   | 0.752    | *** | -7.584    | 0.752    | *** |
| <b>AGEGR</b>                  |                 | 0.106     | 0.023    | *** | 0.155     | 0.023    | *** |
| <b>AGEGR*EDU</b>              | No education    | 0.165     | 0.045    | **  | 0.040     | 0.045    | **  |
|                               | Lower secondary | 0.076     | 0.028    | **  | 0.112     | 0.028    | **  |
|                               | Upper secondary | 0.428     | 0.029    | *** | 0.197     | 0.029    | *** |
|                               | Postsecondary   | 0.658     | 0.034    | *** | 0.478     | 0.034    | *** |
| <b>AGEGR<sup>2</sup></b>      |                 | -1.75E-03 | 2.16E-04 | *** | -2.16E-03 | 2.16E-04 | *** |
| <b>AGEGR<sup>2</sup>*EDU</b>  | No education    | -1.19E-03 | 4.14E-04 | **  | -1.50E-04 | 4.14E-04 | **  |
|                               | Lower secondary | -1.11E-03 | 2.69E-04 | *** | -1.49E-03 | 2.69E-04 | *** |
|                               | Upper secondary | -5.06E-03 | 2.96E-04 | *** | -2.81E-03 | 2.96E-04 | *** |
|                               | Postsecondary   | -7.65E-03 | 3.72E-04 | *** | -6.13E-03 | 3.72E-04 | *** |
| <b>c</b>                      |                 | 0.840     |          |     | 0.758     |          |     |
| <b>Max-rescaled R-Square</b>  |                 | 0.365     |          |     | 0.271     |          |     |
| <b>N</b>                      |                 | 27,844    |          |     | 29,567    |          |     |

SI Fig. 1. Predicted labor force participation rate by age, sex and education, China

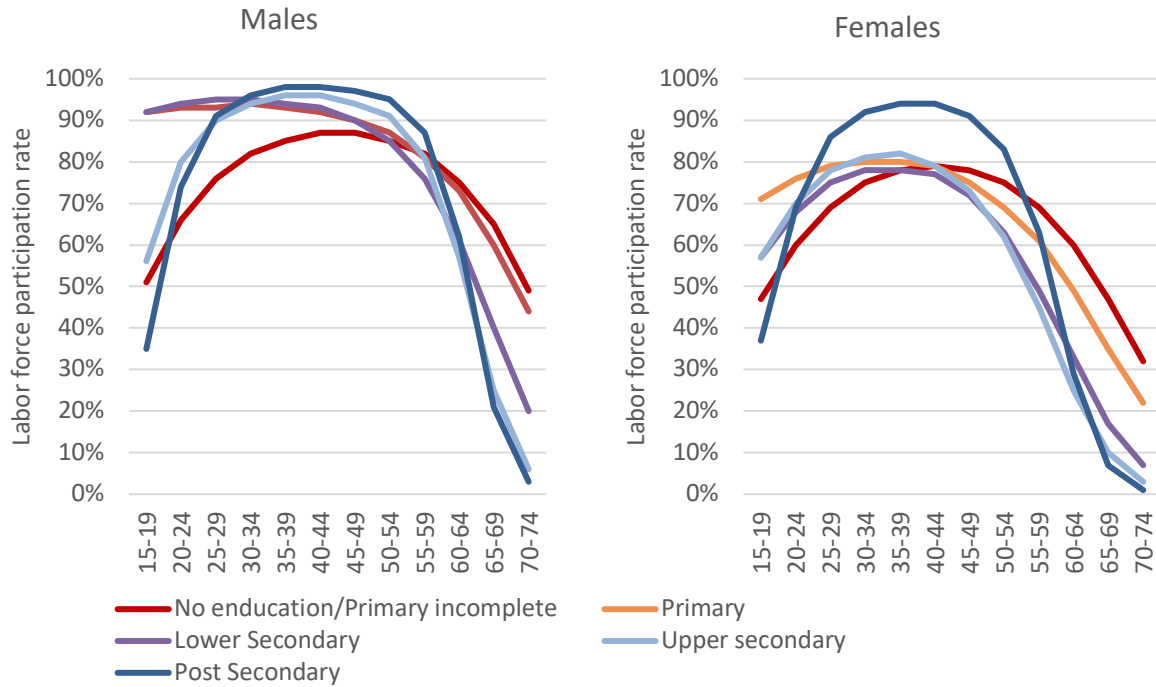

Source: Chinese General Social Survey 2010-2017 (China)

SI Table 3. Productivity factors ( $\exp(\beta_1)$ ) used in the calculation of the PWLFDR

| Educational attainment (e) | Factor (W) |
|----------------------------|------------|
| No education               | 0.357      |
| Primary                    | 0.458      |
| Lower secondary            | 0.694      |
| Upper secondary            | 1          |
| Postsecondary              | 2.031      |

SI Fig. 2. Projected labor force by education, China, 2015-2070

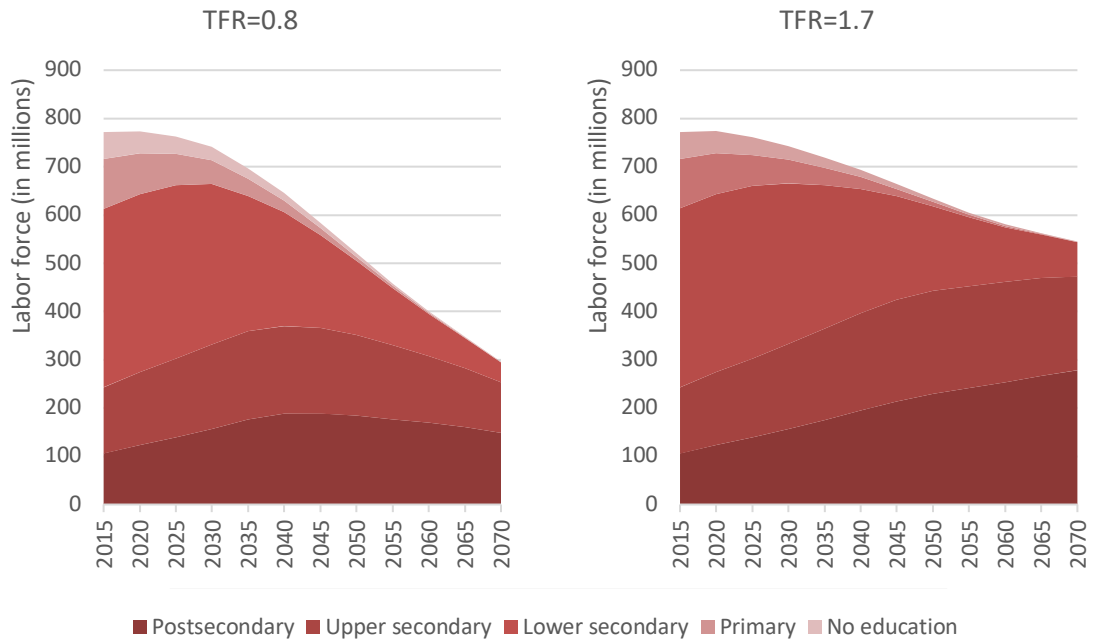

SI Fig. 3. Projected working age size (15-64), labor force (LF) size, and productivity-weighted labor force (PWLF) size, China, 2015-2070

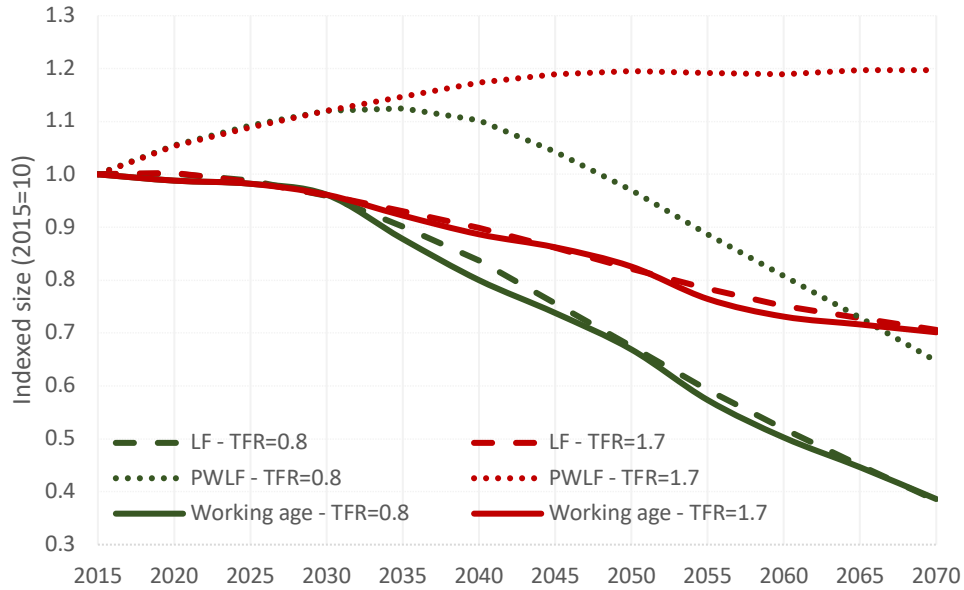

SI Table 4. Projection outcomes, China, 2015-2017

| Year           | Population (in millions) | Working age population (15-64) (in millions) | Labor force (in millions) | Productivity-weighted labor force (in millions) | Inactive (in millions) | Age dependency ratio | Labor force dependency ratio | Productivity-weighted labor force dependency ratio |
|----------------|--------------------------|----------------------------------------------|---------------------------|-------------------------------------------------|------------------------|----------------------|------------------------------|----------------------------------------------------|
| <b>TFR=0.8</b> |                          |                                              |                           |                                                 |                        |                      |                              |                                                    |
| 2015           | 1397                     | 1015                                         | 772                       | <b>674</b>                                      | 625                    | 0.377                | 0.811                        | 0.927                                              |
| 2020           | 1385                     | 1003                                         | 773                       | <b>711</b>                                      | 611                    | 0.380                | 0.791                        | 0.859                                              |
| 2025           | 1365                     | 997                                          | 763                       | <b>736</b>                                      | 602                    | 0.369                | 0.790                        | 0.818                                              |
| 2030           | 1335                     | 976                                          | 741                       | <b>755</b>                                      | 594                    | 0.368                | 0.802                        | 0.787                                              |
| 2035           | 1296                     | 891                                          | 696                       | <b>758</b>                                      | 600                    | 0.454                | 0.862                        | 0.792                                              |
| 2040           | 1248                     | 812                                          | 646                       | <b>743</b>                                      | 602                    | 0.537                | 0.931                        | 0.810                                              |
| 2045           | 1191                     | 749                                          | 584                       | <b>703</b>                                      | 607                    | 0.590                | 1.040                        | 0.863                                              |
| 2050           | 1126                     | 679                                          | 521                       | <b>654</b>                                      | 605                    | 0.659                | 1.160                        | 0.924                                              |
| 2055           | 1051                     | 582                                          | 458                       | <b>598</b>                                      | 593                    | 0.807                | 1.295                        | 0.992                                              |
| 2060           | 973                      | 510                                          | 401                       | <b>545</b>                                      | 573                    | 0.908                | 1.430                        | 1.052                                              |
| 2065           | 895                      | 453                                          | 347                       | <b>492</b>                                      | 548                    | 0.976                | 1.577                        | 1.113                                              |
| 2070           | 818                      | 392                                          | 296                       | <b>436</b>                                      | 522                    | 1.088                | 1.762                        | 1.198                                              |
| <b>TFR=1.7</b> |                          |                                              |                           |                                                 |                        |                      |                              |                                                    |
| 2015           | 1397                     | 1015                                         | 772                       | 675                                             | 625                    | 0.377                | 0.809                        | 0.926                                              |
| 2020           | 1430                     | 1003                                         | 774                       | 711                                             | 656                    | 0.425                | 0.847                        | 0.922                                              |
| 2025           | 1453                     | 997                                          | 761                       | 735                                             | 692                    | 0.458                | 0.910                        | 0.942                                              |
| 2030           | 1461                     | 976                                          | 742                       | 756                                             | 719                    | 0.497                | 0.969                        | 0.951                                              |
| 2035           | 1456                     | 936                                          | 718                       | 774                                             | 738                    | 0.555                | 1.027                        | 0.953                                              |
| 2040           | 1443                     | 900                                          | 694                       | 792                                             | 749                    | 0.604                | 1.079                        | 0.945                                              |
| 2045           | 1424                     | 875                                          | 665                       | 803                                             | 760                    | 0.628                | 1.143                        | 0.945                                              |
| 2050           | 1401                     | 838                                          | 634                       | 807                                             | 767                    | 0.673                | 1.210                        | 0.951                                              |
| 2055           | 1373                     | 776                                          | 605                       | 804                                             | 768                    | 0.769                | 1.269                        | 0.955                                              |
| 2060           | 1340                     | 742                                          | 580                       | 803                                             | 760                    | 0.807                | 1.309                        | 0.946                                              |
| 2065           | 1305                     | 727                                          | 562                       | 808                                             | 743                    | 0.795                | 1.322                        | 0.920                                              |
| 2070           | 1269                     | 712                                          | 545                       | 808                                             | 724                    | 0.782                | 1.329                        | 0.895                                              |
